# Supplementary material
Source: publisher figshare collection journal article supplement (https://acs.figshare.com/ndownloader/files/25909582)
Supplement: Supplementary file 1 [file 25909582]

## Supporting Information

### Elucidating the effects of composition on hydrogen sorption in TiVZrNbHf-based High Entropy Alloys

Gustav Ek<sup>1\*</sup>, Magnus M. Nygård<sup>2</sup>, Adriano F. Pavan<sup>1</sup>, Jorge Montero<sup>3</sup>, Paul F. Henry<sup>1,4</sup>, Magnus H. Sørby<sup>2</sup>, Matthew Witman<sup>5</sup>, Vitalie Stavila<sup>5</sup>, Claudia Zlotea<sup>3</sup>, Bjørn C. Hauback<sup>2</sup>, Martin Sahlberg<sup>1</sup>

<sup>1</sup>Department of Chemistry – Ångström laboratory, Uppsala University, Box 523, SE-75120, Uppsala, Sweden

<sup>2</sup>Institute for Energy Technology, Department for Neutron Materials Characterization, P.O. Box 40, Kjeller NO-2027 Norway

<sup>3</sup>Université de Paris Est, Institut de Chimie et des Matériaux Paris Est, CNRS, UPEC, 94320 Thiais, France

<sup>4</sup>ISIS Pulsed Neutron and Muon source, Rutherford Appleton Laboratory, OX11 0QX, Didcot, United Kingdom

<sup>5</sup>Sandia National Laboratories, Livermore, California 94551, United States

\*Corresponding author: [gustav.ek@kemi.uu.se](mailto:gustav.ek@kemi.uu.se)

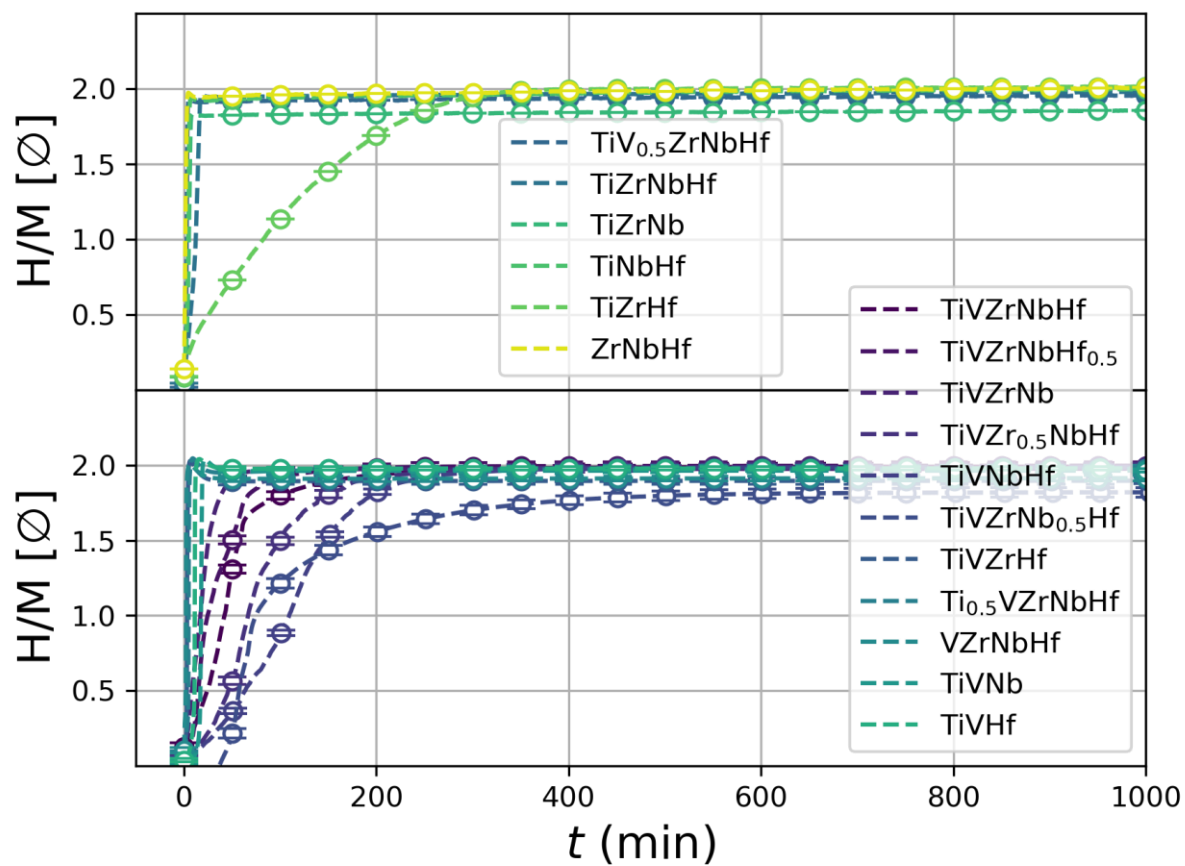

**Figure S1:** Hydrogen absorption kinetics after exposure to 40 bar  $\text{H}_2$  at RT (bottom) and 300°C (top).

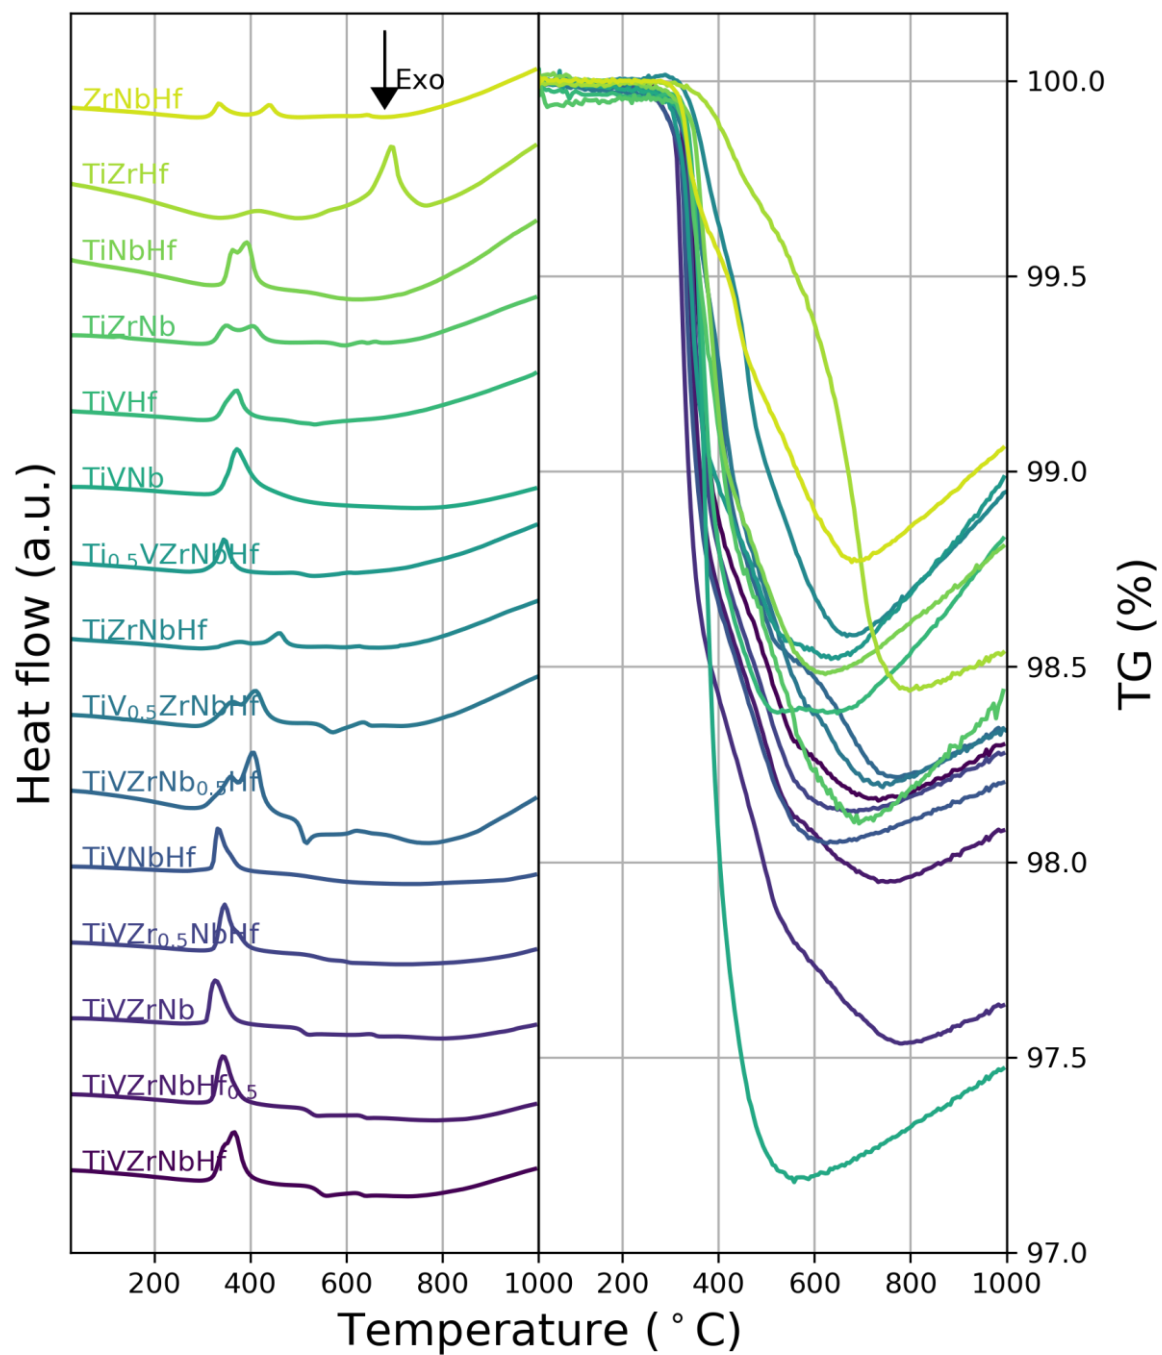

**Figure S2:** TG (right) and DSC (left) traces during hydrogen desorption at 10 °C/min.

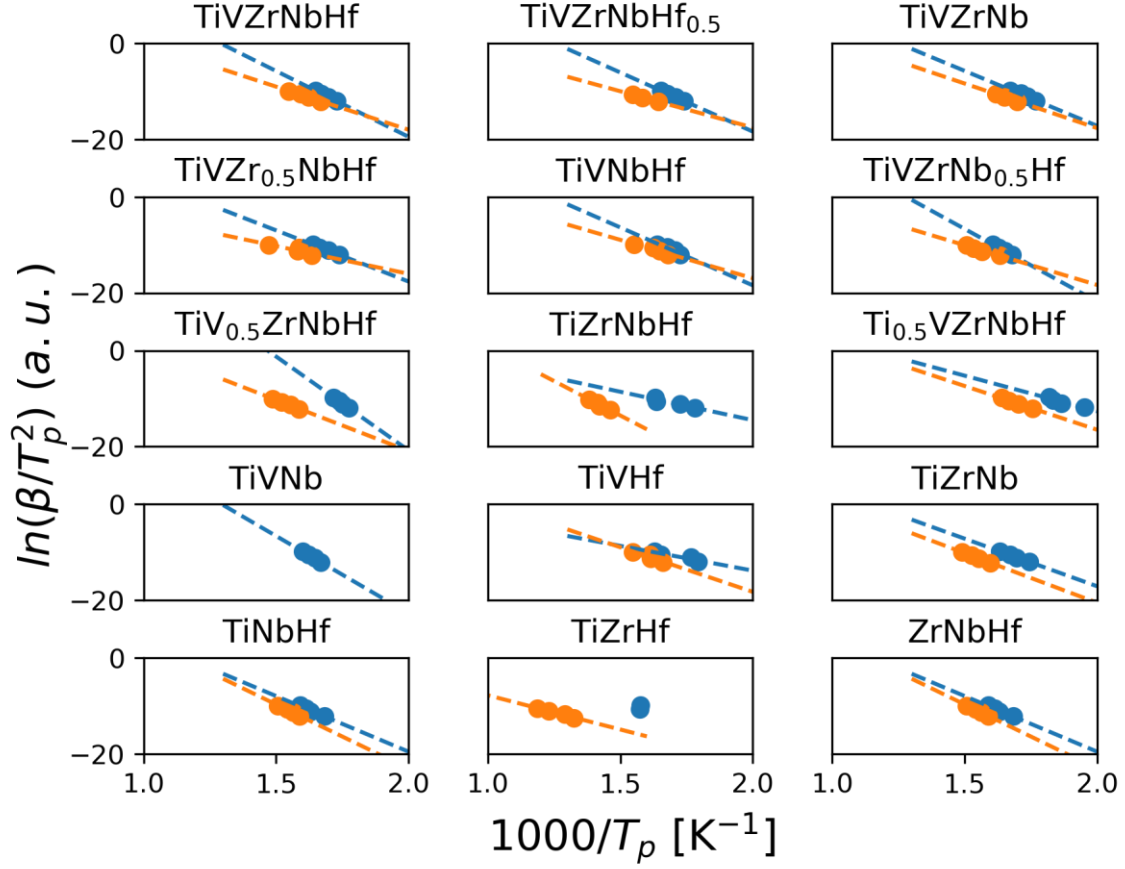

**Figure S3:** Kissinger analysis for the hydrogen desorption for the first (blue) and second (orange) desorption events.

**Table S1:** Calculated coherent neutron scattering cross sections for selected compositions using neutrons with wavelength 1.5 Å.

| Composition              | Neutron scattering cross section (1/cm) |
|--------------------------|-----------------------------------------|
| TiVNbD <sub>6</sub>      | 0.402                                   |
| TiVNb                    | 0.009                                   |
| TiVZrNbD <sub>8</sub>    | 0.458                                   |
| TiVZrNb                  | 0.047                                   |
| TiVZrNbHfD <sub>10</sub> | 0.505                                   |
| TiVZrNbHf                | 0.087                                   |

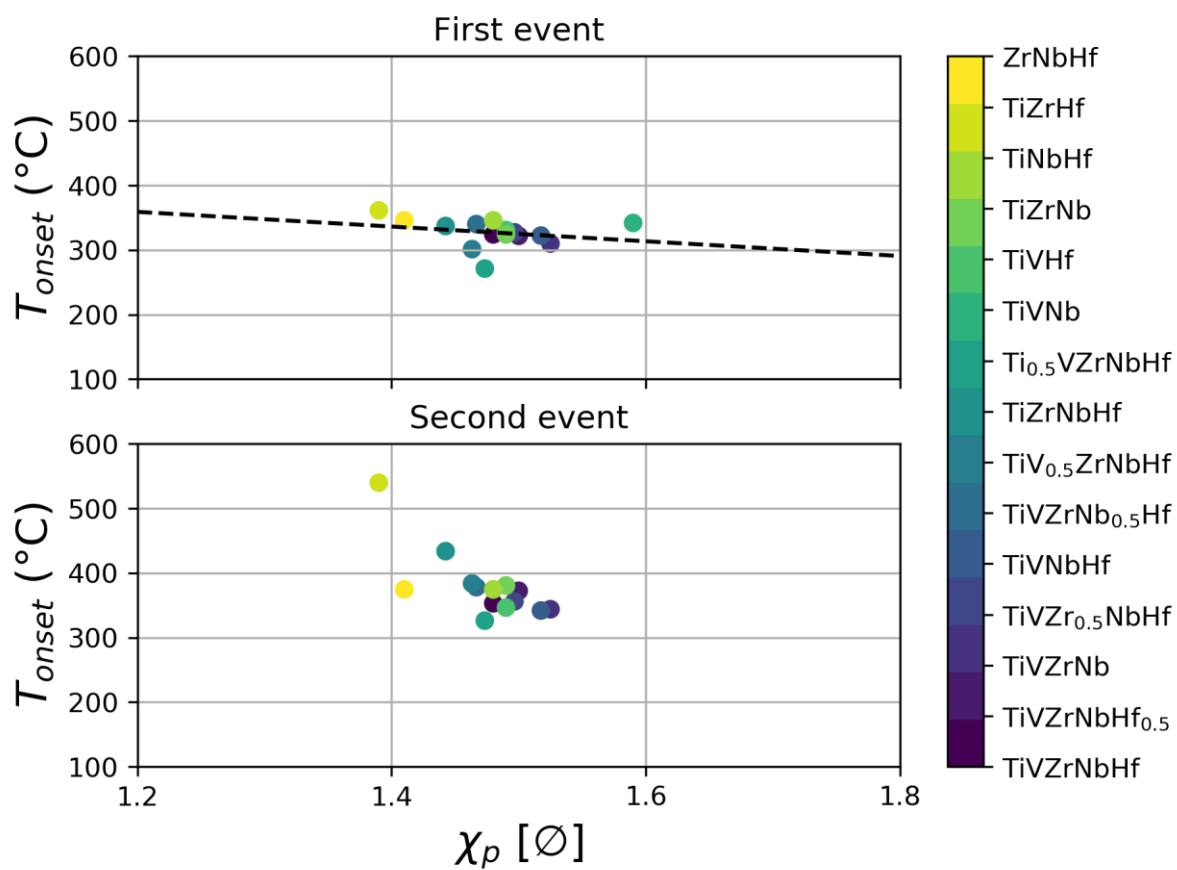

**Figure S4:** The onset temperature of the first (top) and second (bottom) desorption events as a function of the mean Pauling electronegativity.

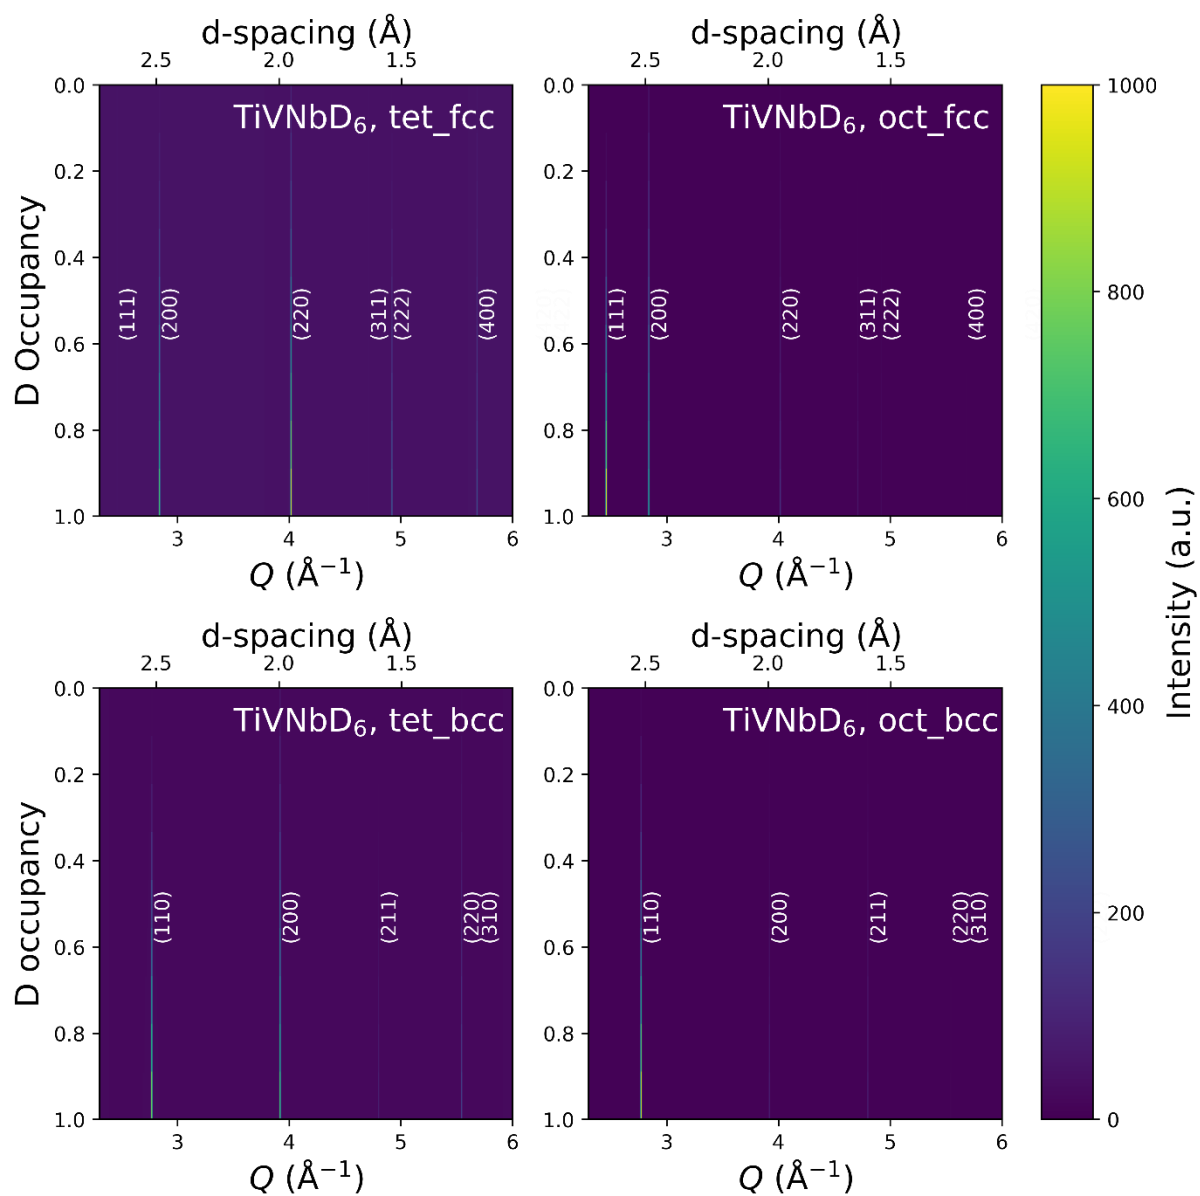

**Figure S5:** Simulated neutron powder diffraction patterns for  $\text{TiVNbD}_6$  with different deuterium occupancy factors and constant unit cell parameter.

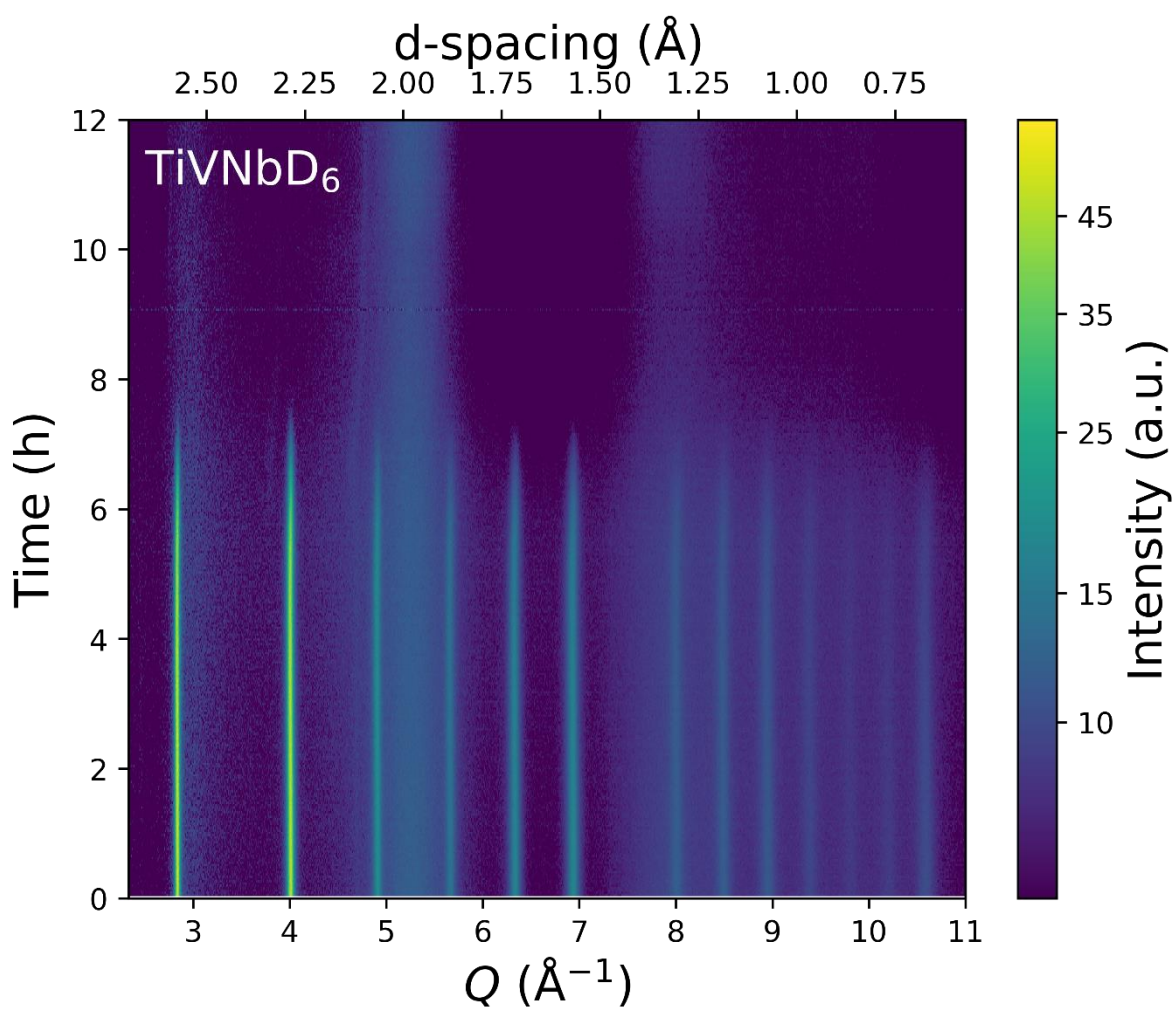

**Figure S6:** In-situ neutron powder diffraction from the backscattering bank of Polaris during desorption of  $\text{TiVNbD}_6$ .

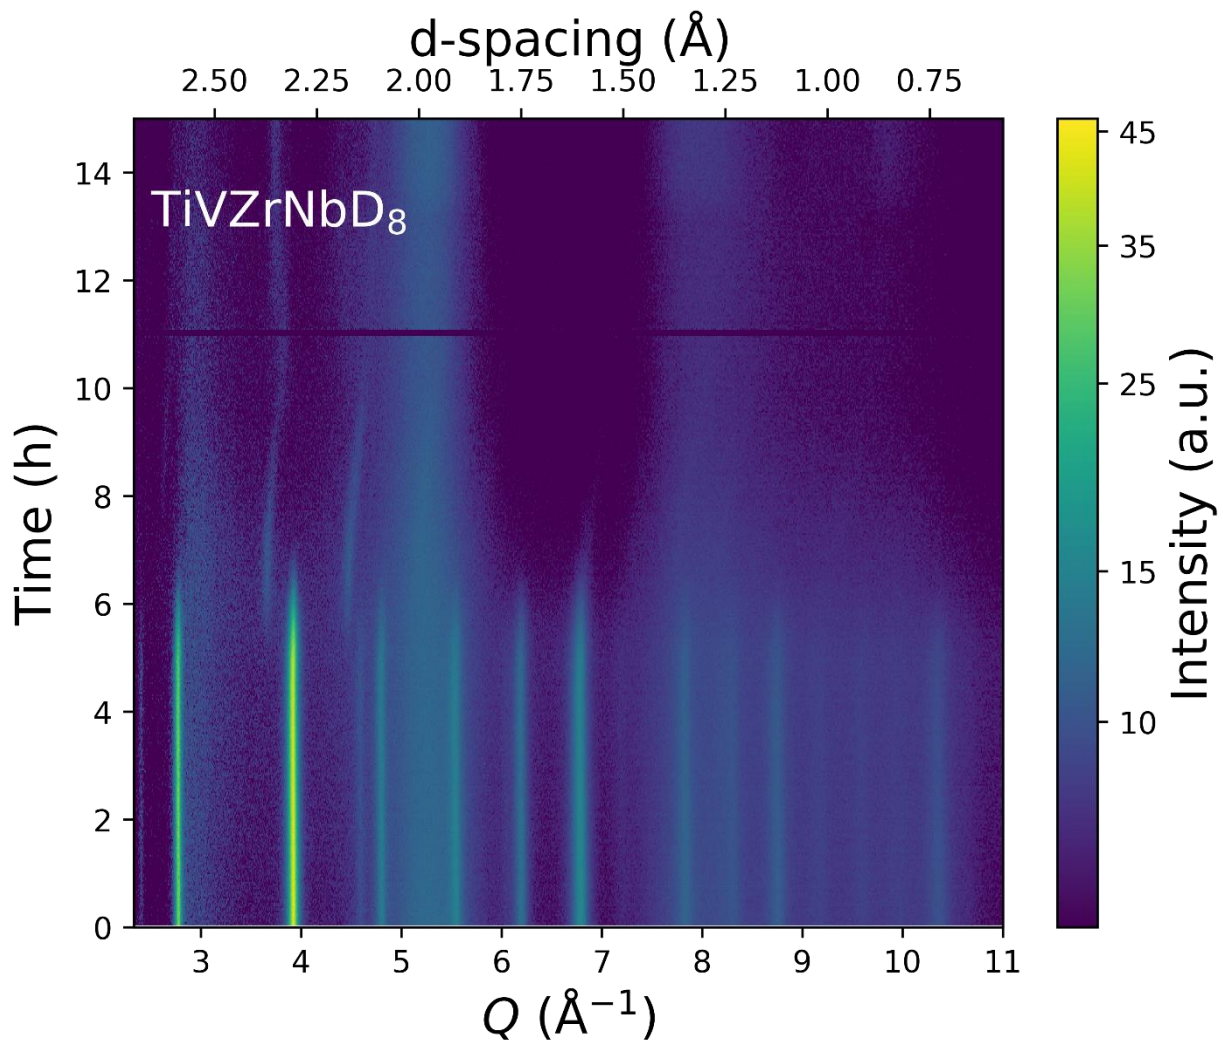

**Figure S7:** In-situ neutron powder diffraction from the backscattering bank of Polaris during desorption of  $\text{TiVZrNbD}_8$ .



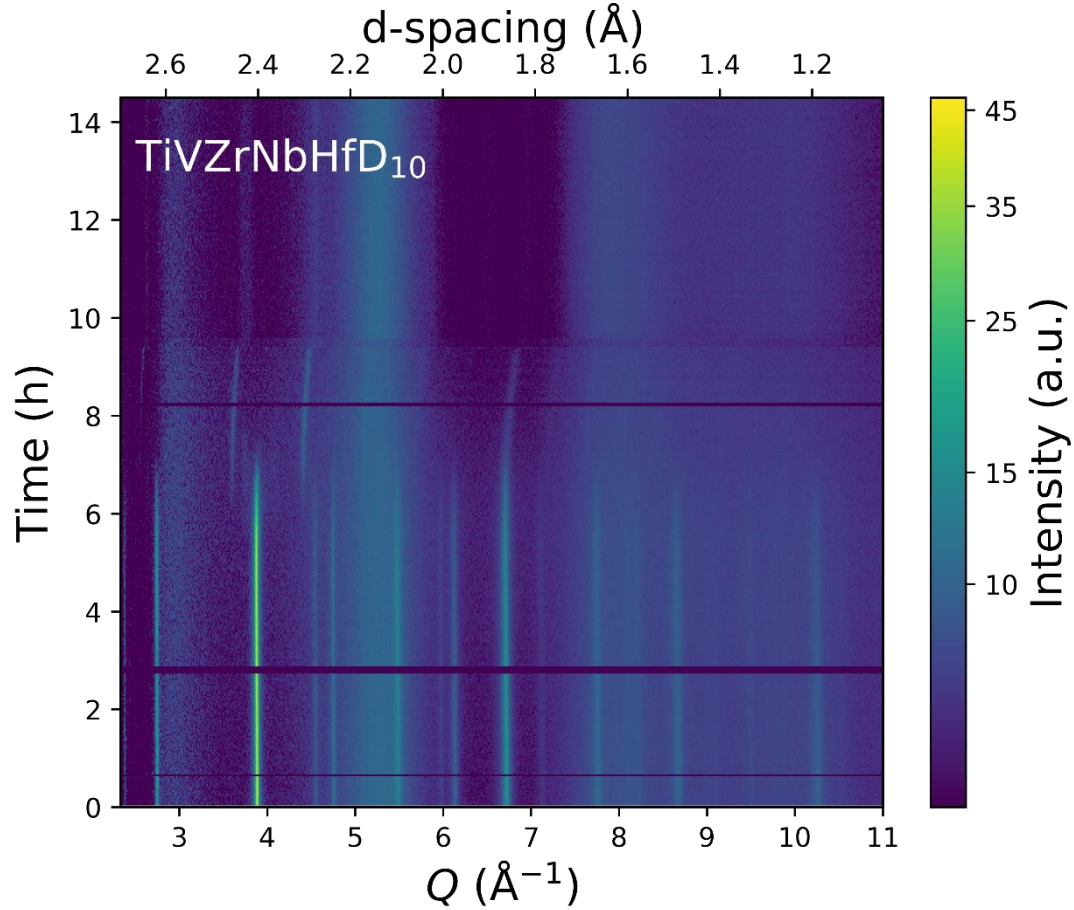

**Figure S8:** In-situ neutron powder diffraction from the backscattering bank of Polaris during desorption of  $\text{TiVZrNbHfD}_{10}$ .

**Table S2:** Crystallographic information and refinement strategies for the in-situ neutron diffraction data.

|                     | Site  | Wyckoff | x    | y    | z    | occupancy     | flag    | limits                                        |
|---------------------|-------|---------|------|------|------|---------------|---------|-----------------------------------------------|
| <b><i>Fm-3m</i></b> |       |         |      |      |      |               |         |                                               |
|                     | Metal | 4a      | 0    | 0    | 0    | nominal       | fixed   | none                                          |
|                     | D_tet | 8c      | 0.25 | 0.25 | 0.25 | $0 < x < 1$   | refined | Total occupancy constrained by TG information |
|                     | D_oct | 4b      | 0.5  | 0    | 0    | $0 < x < 1$   | refined |                                               |
| <b><i>Im-3m</i></b> |       |         |      |      |      |               |         |                                               |
|                     | Metal | 2a      | 0    | 0    | 0    | nominal       | fixed   | none                                          |
|                     | D_tet | 6b      | 0    | 0.5  | 0.5  | $0 < x < 1/3$ | refined | Total occupancy constrained by TG information |
|                     | D_oct | 12d     | 0    | 0.5  | 0.25 | $0 < x < 1/6$ | refined |                                               |

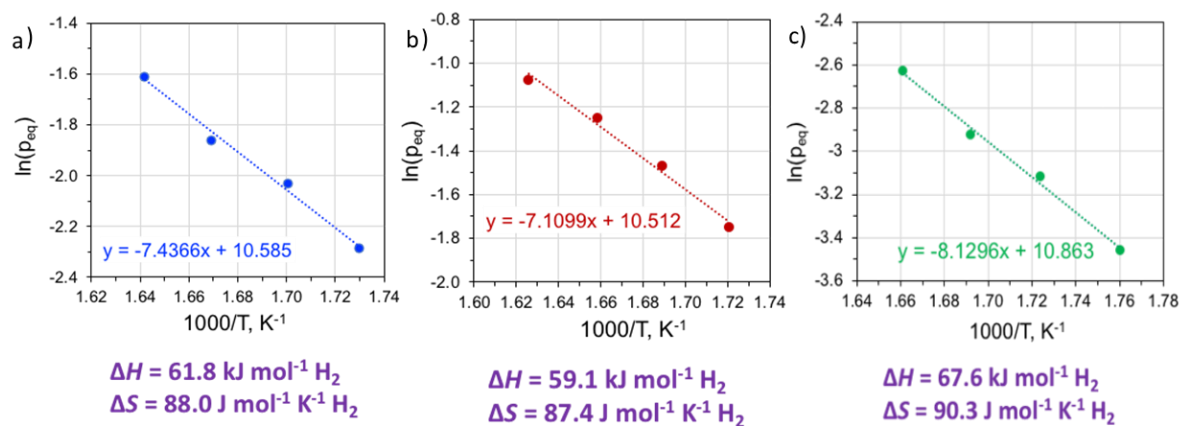

**Figure S9:** Van 't Hoff plot for a) TiVZrNbHf, b) TiV<sub>0.5</sub>ZrNbHf and c) TiVZrNb
